# Supplementary material for: Helical channels, low framework density and structure-directing effect: a novel non-centrosymmetric zinc phosphate NIS-4 prepared by ionothermal reaction
Source: Royal Society of Chemistry journal article supplement (doi:10.1039/c002882g), 2010-01-01
Supplement: c002882g.pdf [file c002882g.pdf]

## Helical channels, low framework density and structure-directing effect: a novel non-centrosymmetric zinc phosphate NIS-4 prepared by ionothermal reaction

Jing-Dong Feng,<sup>a,b</sup> Shu-Wei Tang,<sup>a</sup> Kui-Zhan Shao,<sup>a</sup> Rong-Shun Wang,<sup>\*a</sup> Chan Yao,<sup>a</sup> Hai-Ming Xie<sup>a</sup> and Zhong-Min Su<sup>\*a</sup>

<sup>a</sup> Institute of Functional Material Chemistry, Faculty of Chemistry, Northeast Normal University, Changchun 130024, P. R. China. Fax: (+86) 431-85099511; E-mail: [wangrs@nenu.edu.cn](mailto:wangrs@nenu.edu.cn); [zmsu@nenu.edu.cn](mailto:zmsu@nenu.edu.cn)

<sup>b</sup> Institute of Applied Chemistry, College of Chemistry, Jilin Normal University, Siping 136000, P. R. China

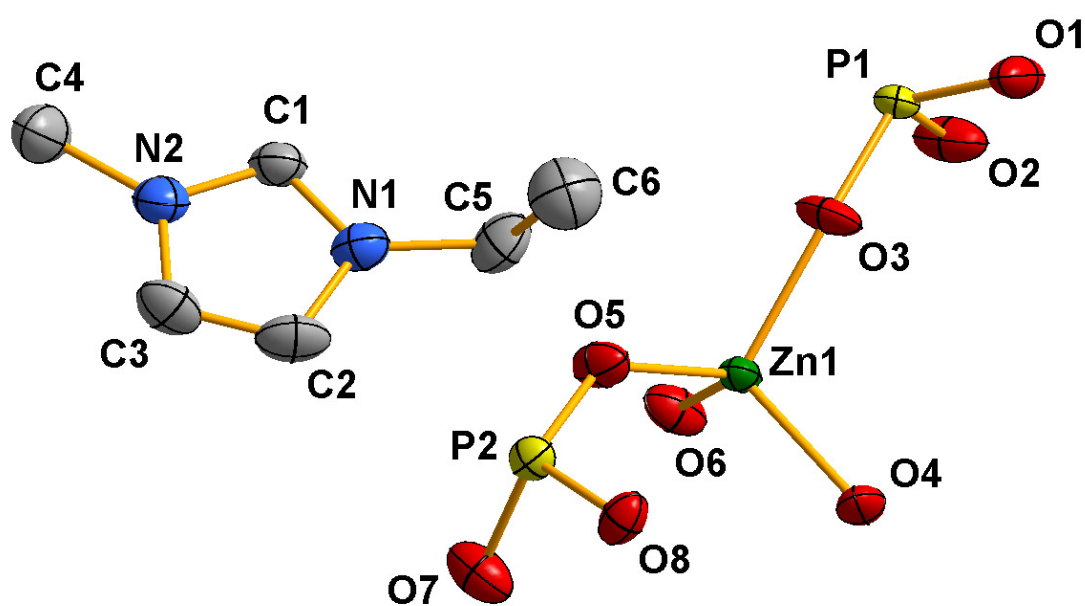

Fig. S1 ORTEP plot of NIS-4. Thermal ellipsoids are given at 50% probability.

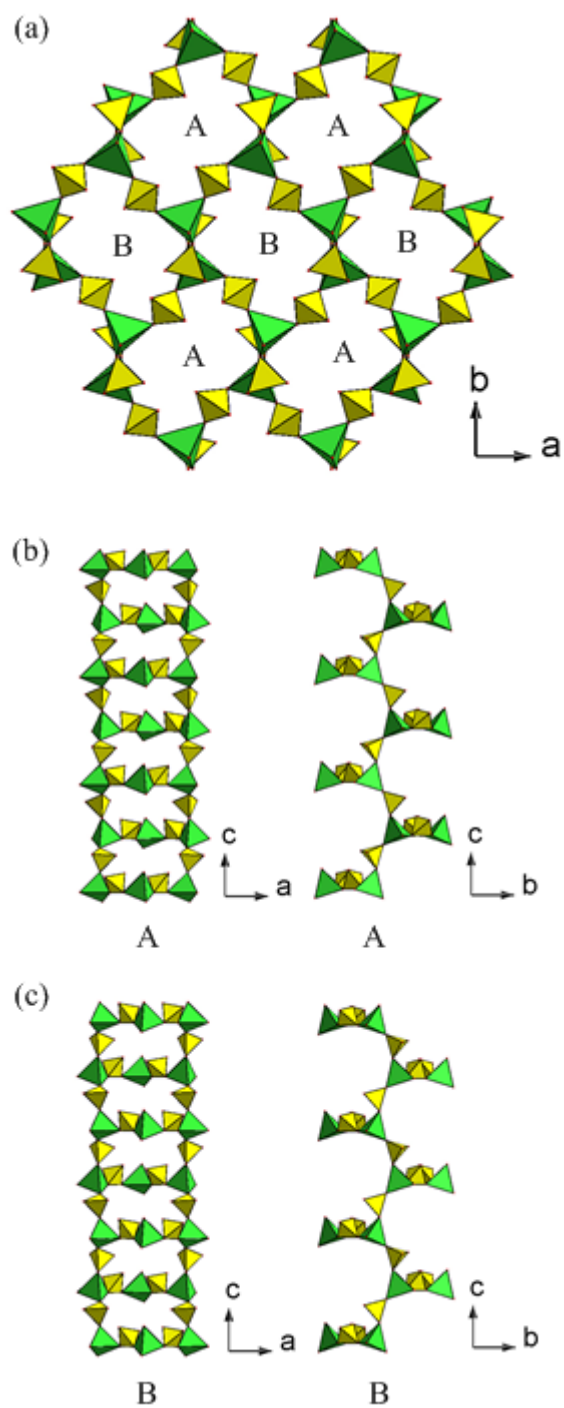

**Fig. S2** (a) Polyhedral view of NIS-4 projected along the [001] direction; (b) the zigzag-ladder structures of the 12-membered ring channel A; (c) the zigzag-ladder structures of the 12-membered ring channel B. Template cations and all hydrogen atoms are not shown for clarity. Green and yellow tetrahedra represent ZnO<sub>4</sub> and PO<sub>4</sub>, respectively.

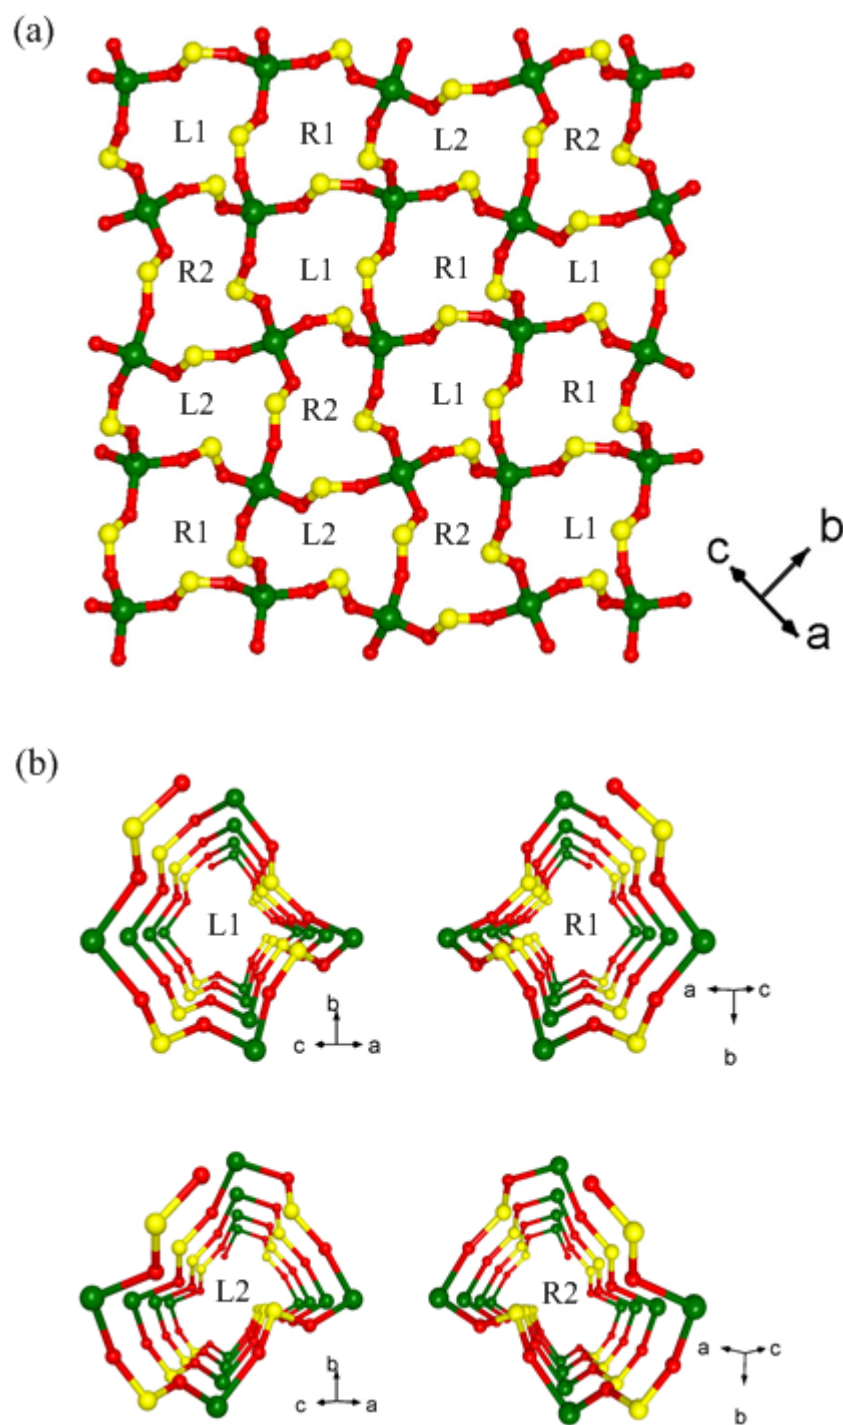

**Fig. S3.** (a) Ball-stick framework and helical representations of helical channels viewed along the [101] direction; (b) the corresponding perspective view of four kinds of helical channels. Template cations and terminal O atoms (or hydroxyls) are omitted for clarity. Zn, P and O atoms are displayed as green, yellow, and red balls, respectively.

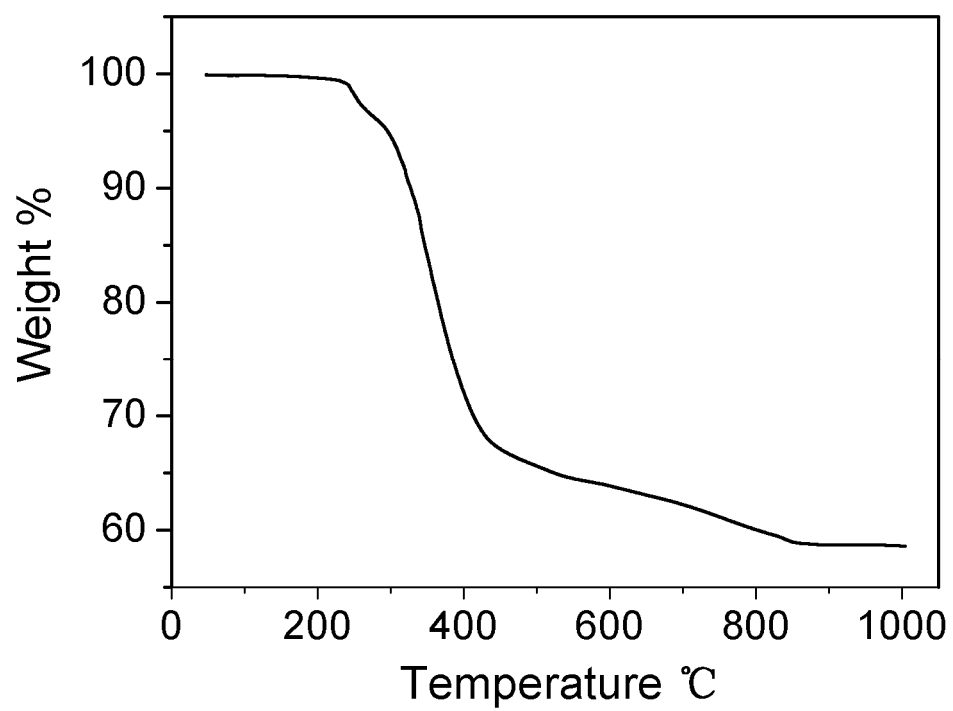

**Fig. S4** TGA curve for NIS-4.

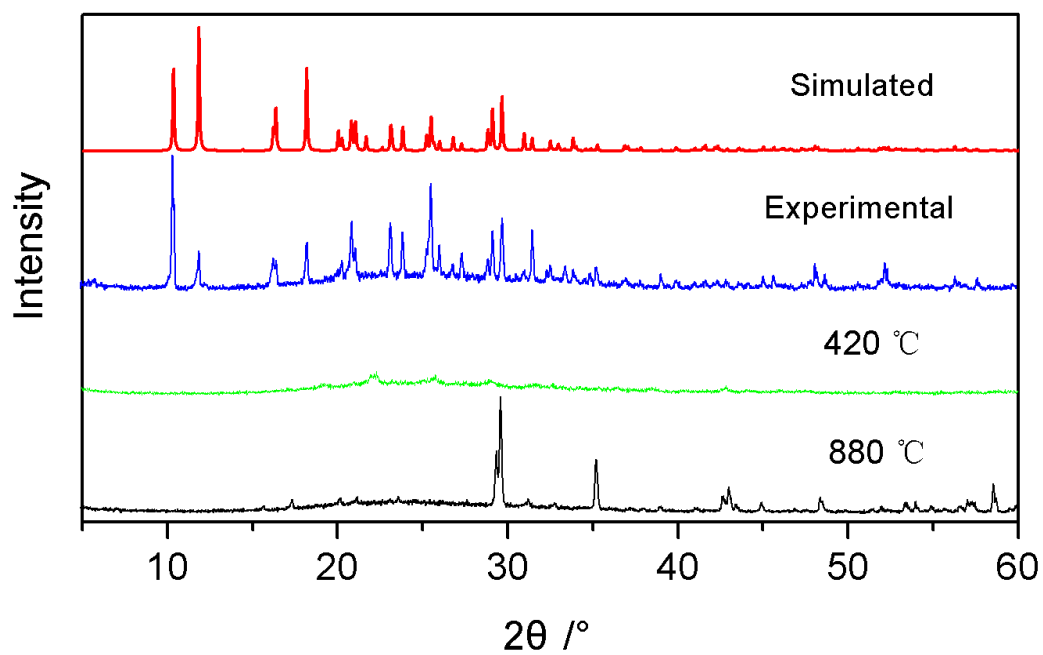

**Fig. S5** PXR D patterns for NIS-4.
